# Supplementary material for: Developmental stage- and concentration-specific sodium nitroprusside application results in nitrate reductase regulation and the modification of nitrate metabolism in leaves of Medicago truncatula plants
Source: PubMed Central journal article supplement — Plant Signal Behav. 2013 Jun 24;8(9):e25479. doi: 10.4161/psb.25479 (PMC4011814; doi:10.4161/psb.25479), 2013-06-24
Supplement: psb-8-e25479-s01.pdf [file psb-8-e25479-s01.pdf]

## **Supplemental Material to:**

**Chrystalla Antoniou, Panagiota Filippou, Photini Mylona,  
Dionysia Fasoula, Ioannis Ioannides, Alexios Polidoros and  
Vasileios Fotopoulos**

**Developmental stage- and concentration-specific sodium  
nitroprusside application results in nitrate reductase  
regulation and the modification of nitrate metabolism in  
leaves of *Medicago truncatula* plants**

**Plant Signaling & Behavior 2013; 8(9)  
<http://dx.doi.org/10.4161/psb.25479>**

**[www.landesbioscience.com/journals/psb/article/25479](http://www.landesbioscience.com/journals/psb/article/25479)**

**SNP-treated *M. truncatula* A17 plants**

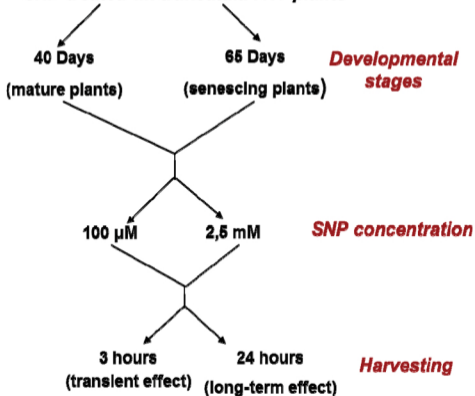

**Table S1.** Oligonucleotides used as primers for real-time RT-PCR.

| <b>Gene</b>                | <b>Primer orientation</b> | <b>Primer sequence</b>                                   | <b>Length of amplified fragment</b> | <b>Tm (°C)</b> | <b>Reference</b> |
|----------------------------|---------------------------|----------------------------------------------------------|-------------------------------------|----------------|------------------|
| <i>NR</i>                  | Forward<br>Reverse        | 5'-GTAGGCCCCACAAAGGAGAA-3'<br>5'-GAAGCGGGTGCAGTCGTAGA-3' | 257bp                               | 60             | TA22623_3880*    |
| <i>Act11</i>               | Forward<br>Reverse        | 5'-ATGCCATCCTTCGTCTTGA-3'<br>5'-GCTGGTCCTGGCTGTCTC-3'    | 182bp                               | 53             | 72               |
| <i>Nitrate transporter</i> | Forward<br>Reverse        | 5'-ATGCAATTGCCCTCTGATTC-3'<br>5'-TGAGCATGGATTGTCCAAAA-3' | 269bp                               | 60             | BE205238*        |
| <i>Nitrite transporter</i> | Forward<br>Reverse        | 5'-CACCACCAAACCTTTGGAAT-3'<br>5'-CGAACGAGCTTGTTGAATGA-3' | 149 bp                              | 60             | AW684979*        |

\* *Medicago* EST sequence Accession no.
